# Supplementary material
Source: PubMed Central journal article supplement (PMC10757563)
Supplement: NIHMS1952358-supplement-Supplementary_Tables.pdf [file NIHMS1952358-supplement-Supplementary_Tables.pdf]

Supplementary Table 1.

| 1           | 2               | 3                        | 4                  | 5               | 6                           |
|-------------|-----------------|--------------------------|--------------------|-----------------|-----------------------------|
| Dro mutants | Depletion Score | MIC [ $\mu\text{g/mL}$ ] | clearing zone (mm) | toeprint signal | readthrough activity (a.u.) |
| WT          | 0.32            | 2                        | 5                  | 0.23            | 45                          |
| G1A         | 0.01            | 2                        | 4                  | ND              | 14                          |
| G1K         | 0.07            | 2                        | 6                  | ND              | 18                          |
| G1T         | 0.04            | 8                        | <2                 | 0.08            | 28                          |
| P3K         | 0.08            | 4                        | 4                  | 0.24            | 9                           |
| P5D         | 0.25            | 8                        | -                  | ND              | 0                           |
| P5N         | 0.28            | 8                        | <2                 | ND              | 0                           |
| Y6A         | 0.01            | 4-8                      | 5                  | ND              | 49                          |
| Y6P         | 0.17            | 4                        | 4                  | ND              | 167                         |
| Y6Q         | 0.04            | 8                        | -                  | ND              | 0                           |
| Y6R         | 0.09            | 2                        | 6                  | ND              | 0                           |
| Y6S         | 0.03            | 2-4                      | 5                  | ND              | 212                         |
| S7T         | 0.04            | 2                        | 7                  | 0.59            | 514                         |
| P8H         | 0.36            | 2                        | 5                  | ND              | 0                           |
| T11P        | 0.06            | 2                        | 8                  | 1.24            | 264                         |
| T11R        | 0.09            | 1                        | 9                  | 1.07            | 168                         |
| S12G        | 0.01            | 1                        | 10                 | 0.63            | 657                         |
| S12P        | 0.00            | 2                        | 9                  | ND              | 534                         |
| H13F        | 0.05            | 2                        | 7                  | 0.62            | 417                         |
| P14M        | 0.02            | 8                        | -                  | 1.71            | 0                           |
| R15A        | 1.43            | >64                      | -                  | ND              | 0                           |
| I17M        | 0.06            | 4                        | 7                  | 0.71            | 222                         |
| R18A        | 1.62            | 8                        | 2                  | ND              | 0                           |
| Api137      | -               | 1                        | 7                  | 1.00            | 213                         |

**Supplementary Table. 1 Cell-inhibitory activity of synthetic Dro variants.**

**Column 1:** Unmodified synthetic Dro variants with the indicated mutations. **Column 2:** Depletion score of the corresponding genes in the library selection experiments (see Fig. 4). **Column 3:** The result of the liquid culture MIC experiments in 25% cation-adjusted MHB medium. **Column 4:** Diameter of the zone of no cell growth in the drop-diffusion test on the supplemented M9 minimal medium plate (see Fig. 5b). **Column 5:** Relative intensity of the toeprint band corresponding to the PrAMP-arrested ribosome at the stop codon (see Fig. 5a and Extended Data Fig. 4); bands with the intensity below that of WT Dro were not quantified (ND). **Column 6:** Readthrough activity quantified as the total intensity of the GFP fluorescence above background in the drop-diffusion experiments (Fig. 5b); see Methods for details. Api137 was included as a control.

Supplementary Table 2.

**DNA oligonucleotides used in the study**

| <b>Primer Name</b>   | <b>Sequence</b>                                                                          |
|----------------------|------------------------------------------------------------------------------------------|
| T7                   | ATTAATACGACTCACTATAGGG                                                                   |
| NV1                  | GGTTATAATGAATTTTGCTTATTAAC                                                               |
| sfGFP-fwd            | TAATACGACTCACTATAGGG                                                                     |
| sfGFP-ref            | CATGAAGCTTATTTTTCGAACTGCGGAT                                                             |
| T7-IR-AUG            | TAATACGACTCACTATAGGGCTTAAGTATAAGGAGGAAAACATATG                                           |
| IR-yrbA-fs15- RF1    | GTATAAGGAGGAAAACATATGATATACCCCTGCGGAGTGGGCGCGGATCGCAAACCTGAACGGCTTTAGGCCGACCTCGACAGTTGGA |
| IR-yrbA-fs15- RF2    | GTATAAGGAGGAAAACATATGATATACCCCTGCGGAGTGGGCGCGGATCGCAAACCTGAACGGCTTTGAGCCGACCTCGACAGTTGG  |
| posT-NV1             | GGTTATAATGAATTTTGCTTATTAACCTCGACATCGCATCAGGATTCAGCACGTGAATCCAACCTGTCGAGGTCTG             |
| Dro-Lib-Fwd          | ACTCTTCCCTACACGACGCTCTTCCGATCTAGCTCAGTTTTATAAGGAGGAAAACAT                                |
| Dro-Lib-Rev          | GACTGGAGTTCAGACGTGTGCTCTTCCGATCTTGCATGCCTGCAGGTCTGA                                      |
| IDT8_i57 – IDT8_512  | AATGATACGGCGACCACCGAGATCTACACTCAGGCTTACACTCTTCCCTACACGACGCTC                             |
| IDT8_i77 – IDT8_i712 | CAAGCAGAAGACGGCATACGAGATCGCATGATGGTACTGGAGTTCAGACGTGTG                                   |
